# Supplementary material for: Characteristic Structural Knowledge for Morphological Identification and Classification in Meso-Scale Simulations Using Principal Component Analysis
Source: MDPI journal article supplement (doi:10.3390/polym13162581), 2021-08-04
Supplement: s1 [file s1]

## Supplement Materials

### Characteristic structural knowledge for morphological identification and classification in meso-scale simulations using principal component analysis

Natthiti Chiangraeng <sup>1</sup>, Michael Armstrong <sup>1</sup>, Kiattikhun Manokruang <sup>1</sup>, Vannajan Sanghiran Lee <sup>2,3</sup>, Supat Jiranusornkul <sup>4</sup>, and Piyaat Nimmanpipug <sup>1,3,\*</sup>

<sup>1</sup> Department of Chemistry, Faculty of Science, Chiang Mai University, Chiang Mai, 50200, Thailand; natthiti.c@gmail.com (N.C.); armstrongmichael119@gmail.com (M.A.); kiattikhun.m@cmu.ac.th (K.M.)

<sup>2</sup> Department of Chemistry, Faculty of Science, University of Malaya, 50603 Kuala Lumpur, Malaysia; vannajan@um.edu.my (V.S.L.)

<sup>3</sup> Center of Excellence for Innovation in Analytical Science and Technology (I-ANALY-S-T), Chiang Mai University, Chiang Mai 50200, Thailand

<sup>4</sup> Department of Pharmaceutical Sciences, Chiang Mai University, Chiang Mai 50200, Thailand; supat.jira@cmu.ac.th (S.J.)

\* Correspondence: piyaat.n@cmu.ac.th (P.N.)

**Table S1.** Parameters used in DPD simulation in dimensionless unit.

| Parameter                                                                       |                      |
|---------------------------------------------------------------------------------|----------------------|
| Particle number, $N$                                                            | 24,000               |
| Simulation box volume                                                           | 8000                 |
| Coarse-grained degree, $N_m$                                                    | 5                    |
| Spring constant, $C_{ij}$                                                       | 4                    |
| Thermal energy, $k_B T$                                                         | 1                    |
| Repulsion parameter of the same beads, $a_{ii}$                                 | 131.50               |
| Repulsion parameter of the different beads, $a_{ij}$<br>at temperature of 393 K | 142.18               |
| Time step, $\Delta t$                                                           | 0.01                 |
| Equilibrium step number                                                         | $1 \times 10^6$      |
| Production step number                                                          | $\geq 1 \times 10^7$ |

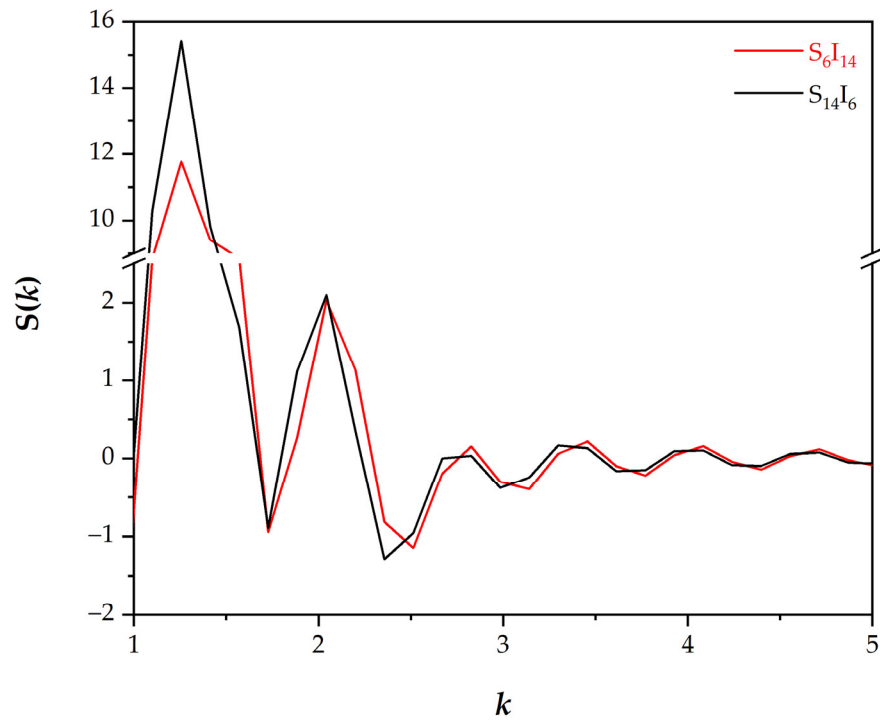

**Figure S1.** Structure factors  $S(k)$  between chain-chain types of the gyroidal morphologies of  $S_6I_{14}$  and  $S_{14}I_6$  were represented as red and black lines, respectively.

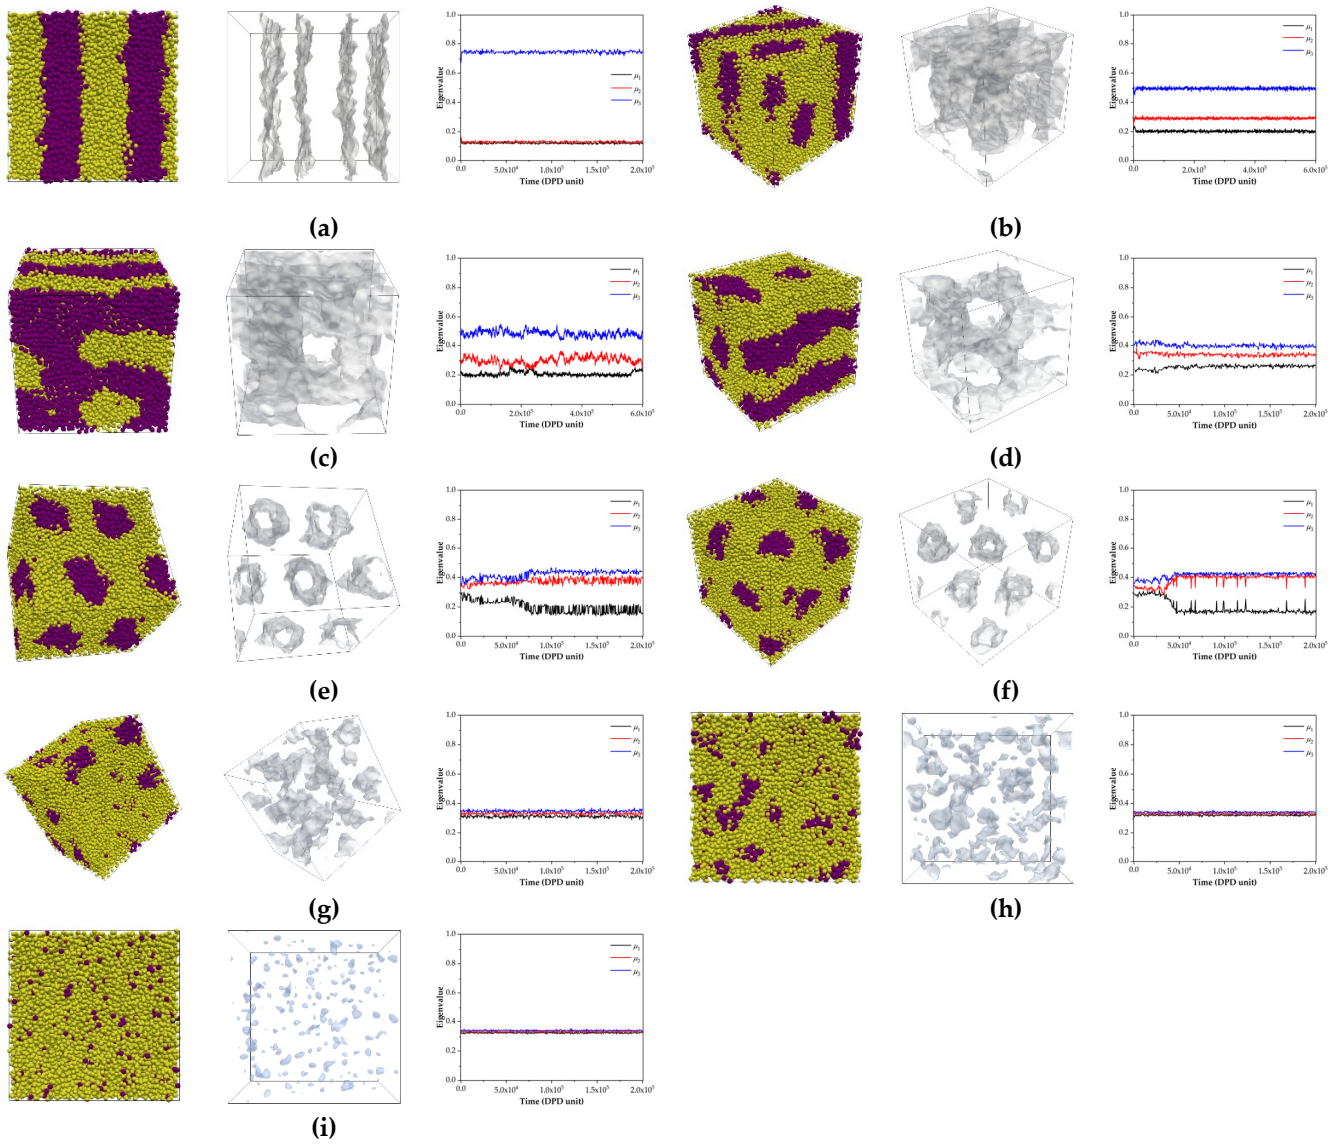

**Figure S2.** Panels in the composite figures illustrate apparent bead-arrangement, isosurface between distinct bead types and order parameter sorting from the left to right of (a) S11I9, (b) S12I8, (c) S13I7, (d) S14I6, (e) S15I5, (f) S16I4, (g) S17I3, (h) S18I2, and (i) S19I1, respectively. The order parameters were calculated using an executable, namely isosueface.exe, that is an implemented tool in DL\_MESO software. Yellow and violet beads represent coarse-grained beads of styrene and isoprene, respectively.

**Script S1:** Structural knowledge analysis and PCA visualization  
7/29/2021

**Libraries**

```
library(tidyverse)
library(ggforce)
library(factoextra)
library(ggrepel)
library(corrplot)
```

**Data**

```
data <- <name_of_excel_file>[<range_of_row>,<range_of_column>]
data
data.frame <- as.matrix.data.frame(data)
data.frame
```

**Run the PCA**

```
pca <- prcomp(data.frame,scale = TRUE)
pca
```

```
summary(pca)
```

```
eig.val <- get_eigenvalue(pca)
eig.val
```

```
options(ggrepel.max.overlaps = Inf)
```

```
fviz_eig(pca)
```

```
fviz_pca_ind(pca,title = "",geom = "point",col.ind = "cos2", gradient.cols = c("#00AFBB", "#E7B800", "#FC4E07"))
```

```
fviz_pca_var(pca,title = "",label = "none",col.var = "cos2",gradient.cols = c("#00AFBB", "#E7B800", "#FC4E07"))
```

```
res.var <- get_pca_var(pca)
```

```
res.var$coord
```

```
res.var$contrib
```

```
res.var$cos2
```

```
corrplot(res.var$cos2, is.corr = TRUE,)
```

#
